# Supplementary material
Source: PubMed Central journal article supplement (PMC374345)

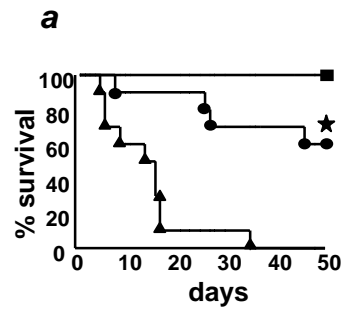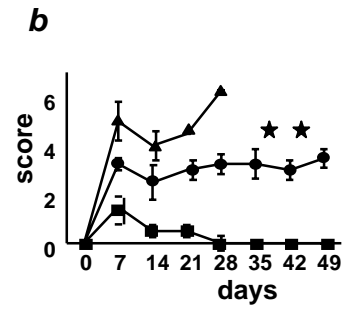

Supplement: pnas_101_11_3921__2.pdf [file pnas_101_11_3921__2.pdf]
